# Supplementary material
Source: publisher figshare collection journal article supplement (https://sage.figshare.com/ndownloader/files/12968393)
Supplement: Supplementary file 1 [file 12968393]

## SUPPLEMENTAL ONLINE APPENDIX

### The Consequences of Long-Term Unemployment: Evidence from Linked Survey and Administrative Data

Katharine G. Abraham, John Haltiwanger, Kristin Sandusky, and James R. Spletzer

Figure A.1. Employment-to-Population Rate and Unemployment Rate, 2003–2010

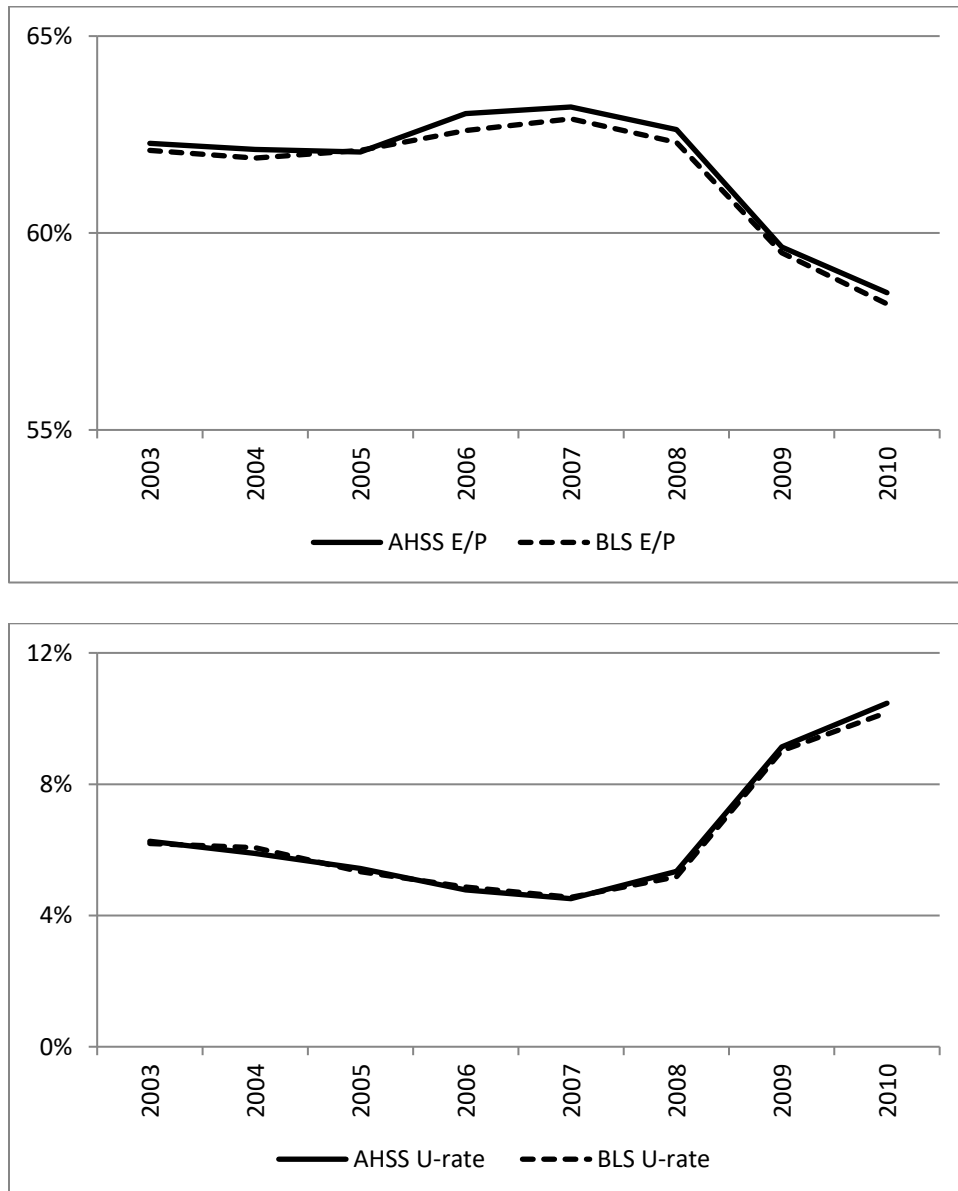

Source: National estimates from the Bureau of Labor Statistics website, based on Labstat series LNU00000000, LNU02000000, and LNU03000000.

Notes: CPS-LEHD weighted microdata for residents of 31 states (“AHSS”).

**Figure A.2. Duration of Unemployment, 2003–2010**

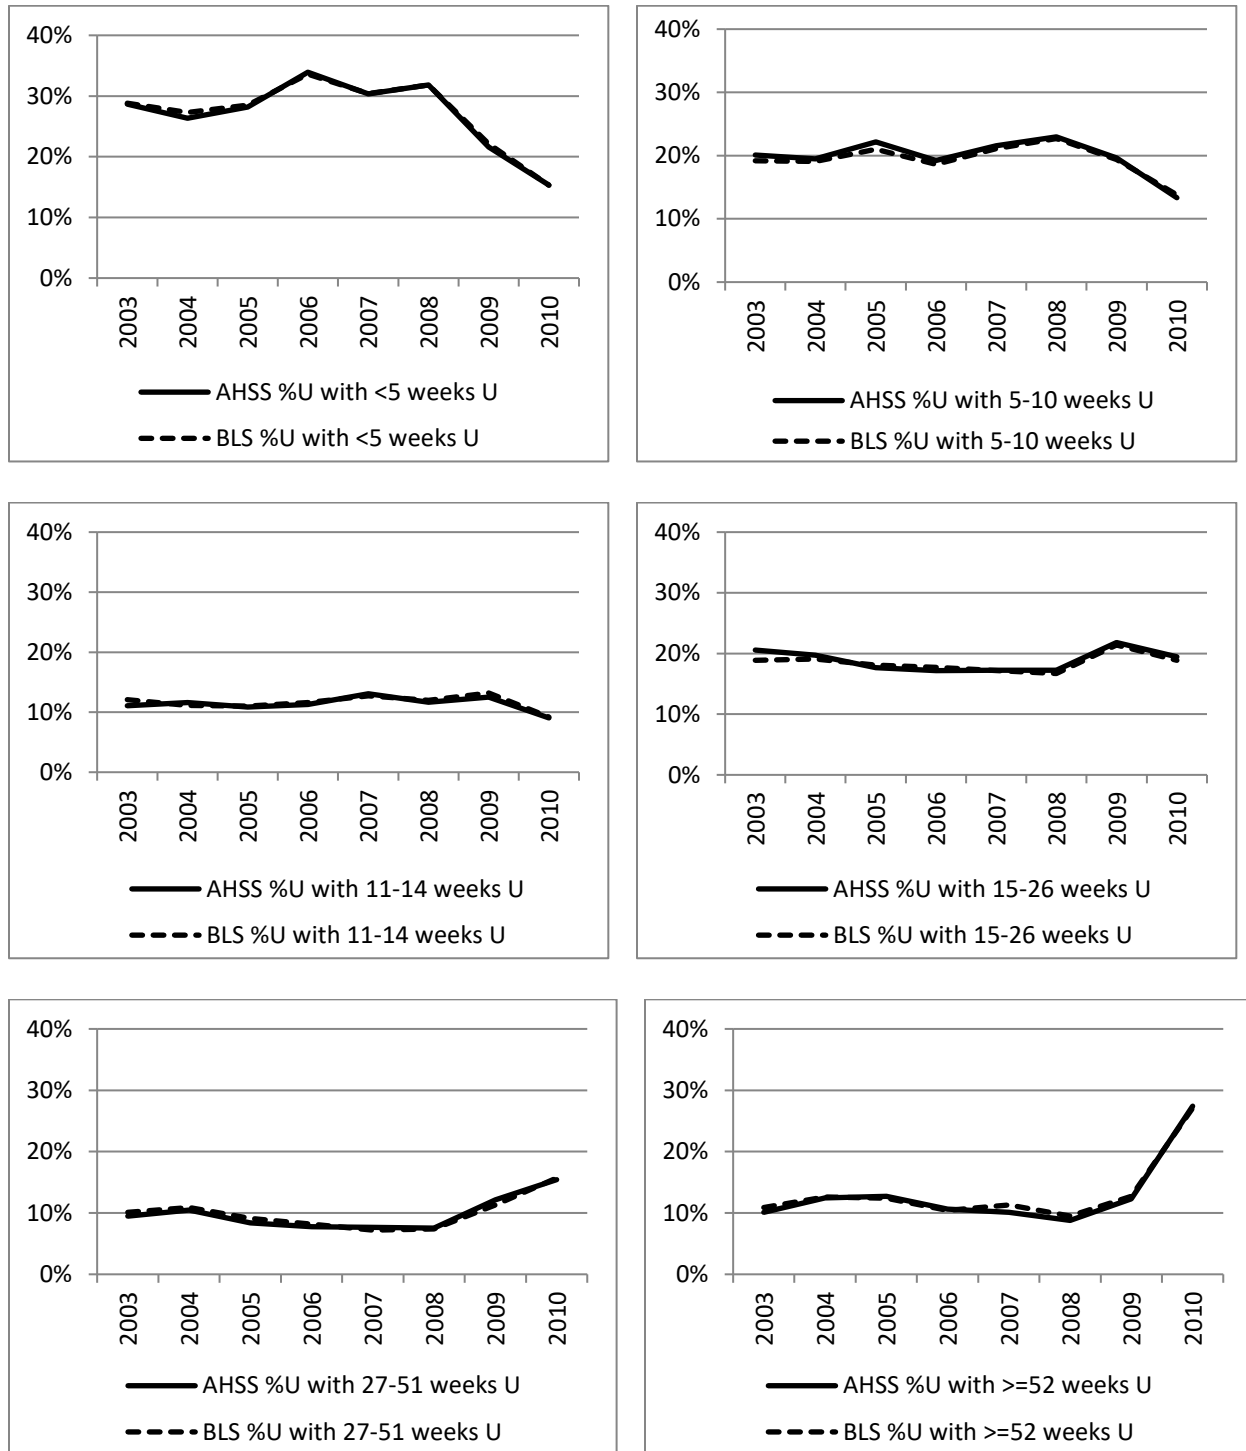

*Source:* National estimates from the Bureau of Labor Statistics website, based on Labstat series LNU03008396, LNU03008756, LNU03008816, LNU03008876, LNU03008936, and LNU03008696.

*Notes:* CPS-LEHD weighted microdata for residents of 31 states (“AHSS”).

**Figure A.3A. Real Earnings (IHS Earnings  $\geq 0$ )**

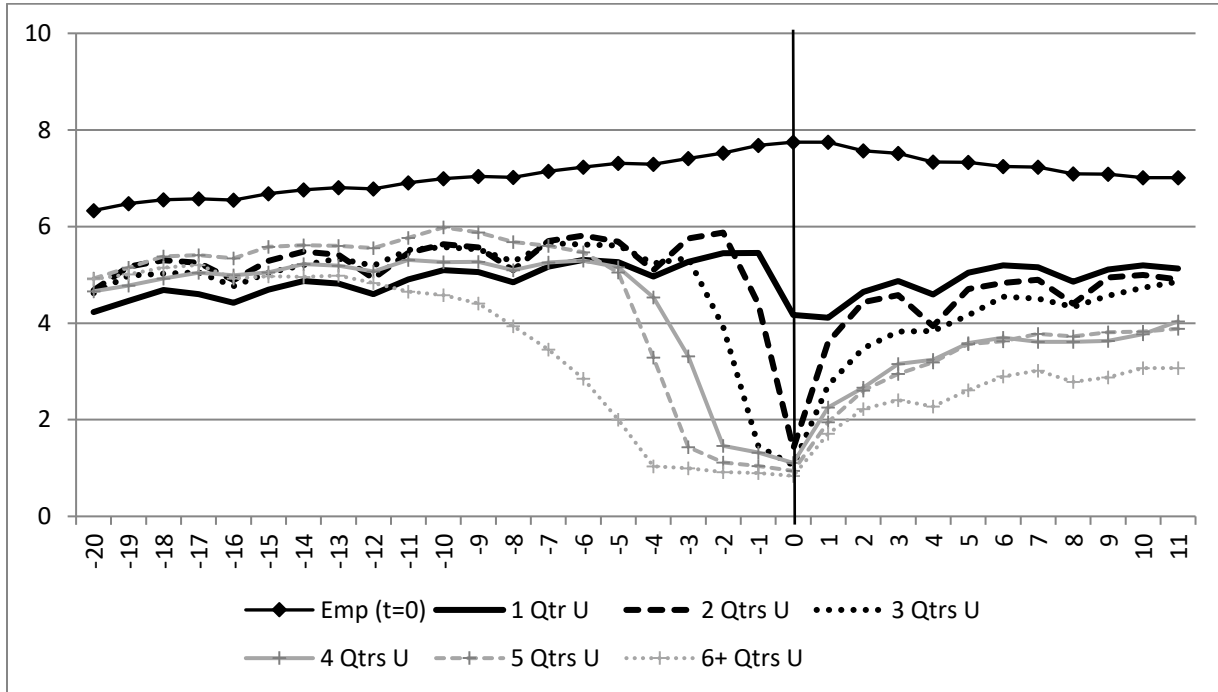

**Figure A.3B. Real Earnings (IHS Earnings  $> 0$ )**

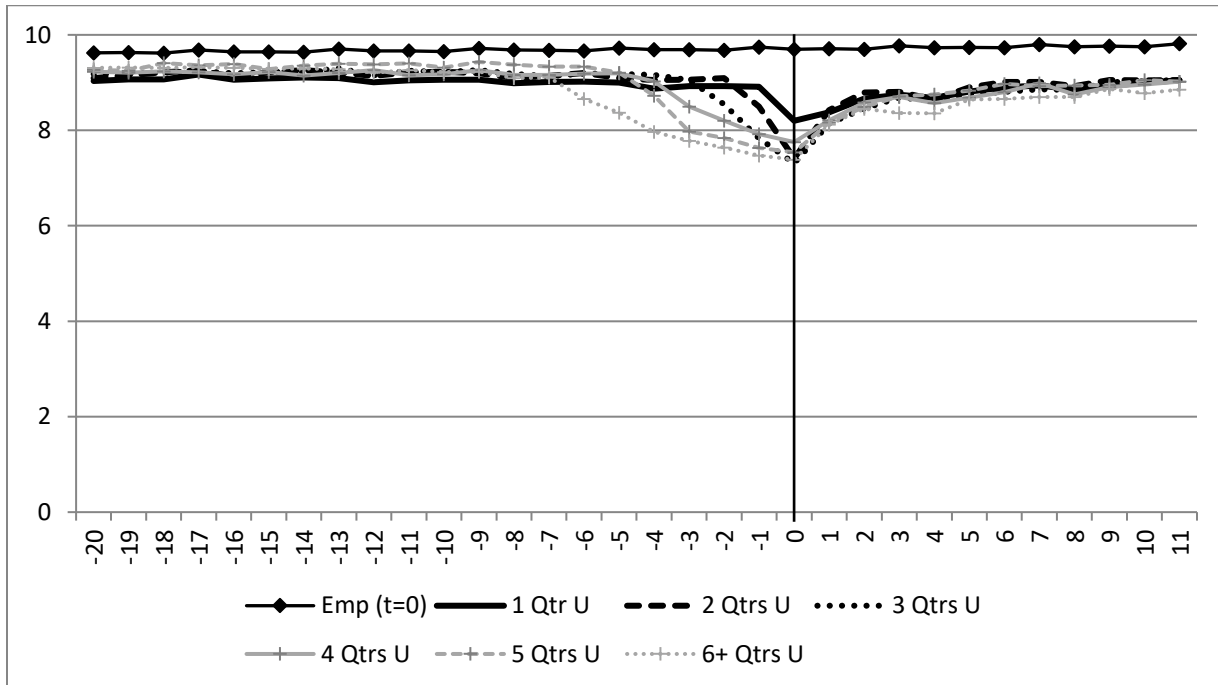

*Notes:* Left axis is weighted IHS(UI earnings) of March Current Population Survey (CPS) respondents in linked sample with indicated labor force status as of  $q = 0$ , the quarter of the CPS interview. Estimates in top panel include those with zero earnings in a given quarter; estimates in bottom panel do not. IHS, Inverse Hyperbolic Sine; UI, unemployment insurance.

Figure A.4. Employment Probabilities, by Age {< 30, 30–49, ≥ 50}

Age < 30

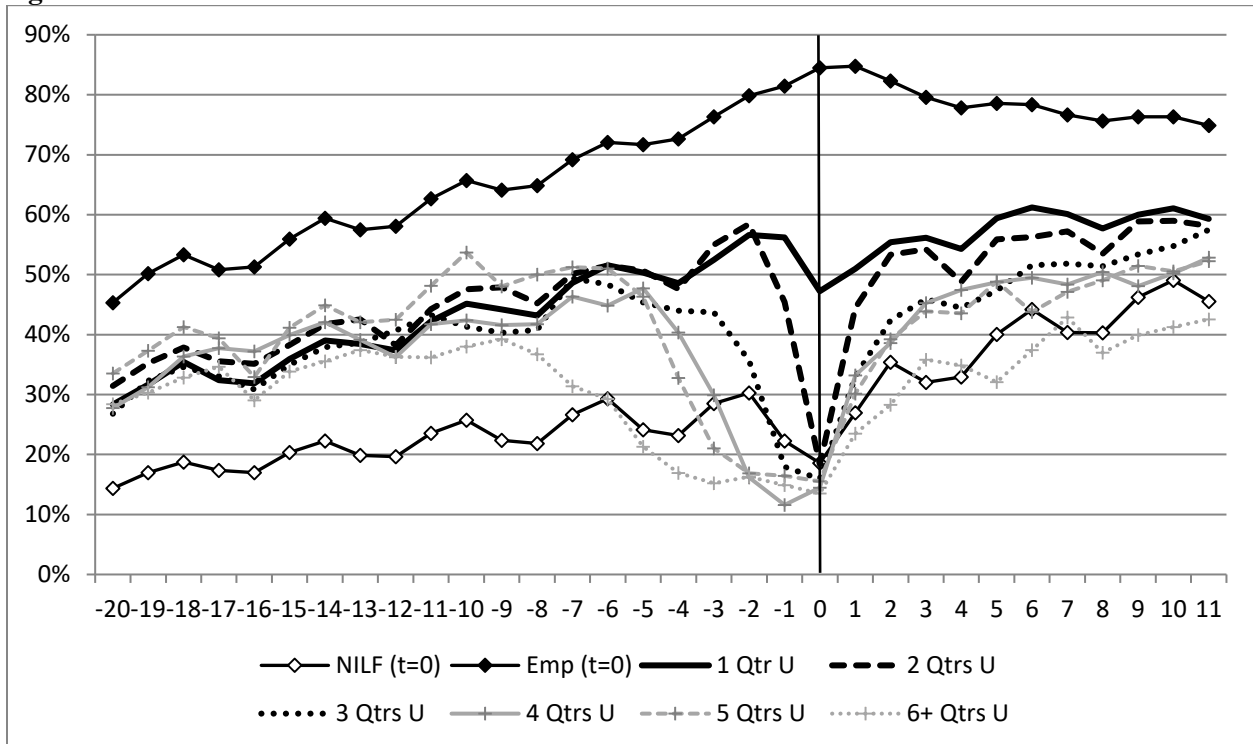

Age 30–49

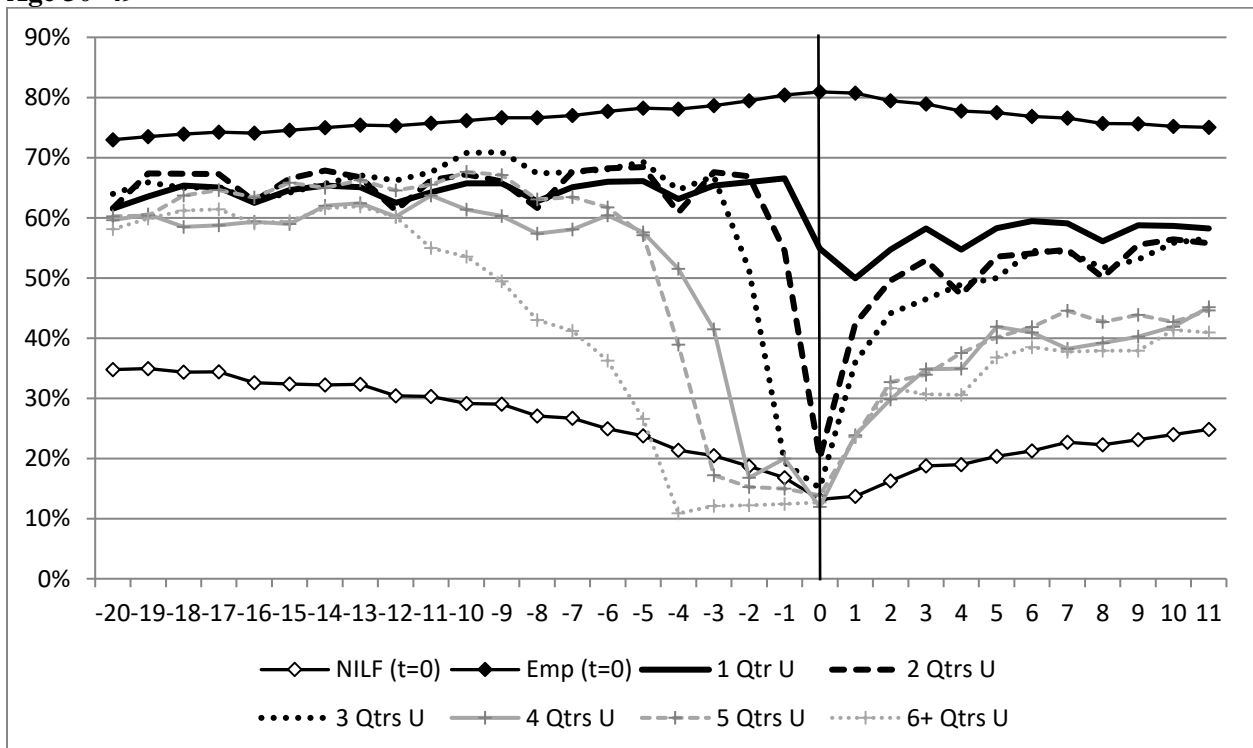

Figure A.4. Continued

Age  $\geq 50$

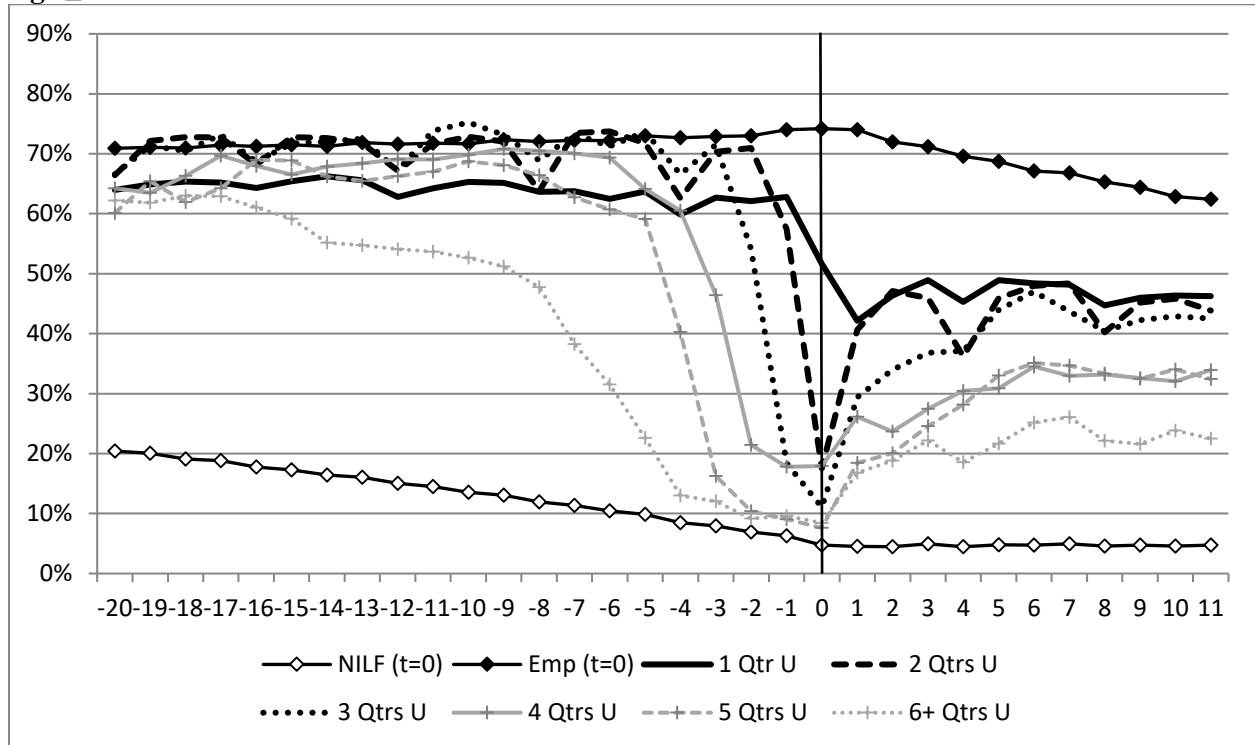

Notes: Left axis is weighted UI employment rate of March Current Population Survey (CPS) respondents in linked sample with indicated labor force status as of  $q = 0$ , the quarter of the CPS interview. NILF, not in the labor force; UI, unemployment insurance.

**Figure A.5. Employment Probabilities, by Reason for U {Job Loser, Other EU, NU}**

**Job Loser**

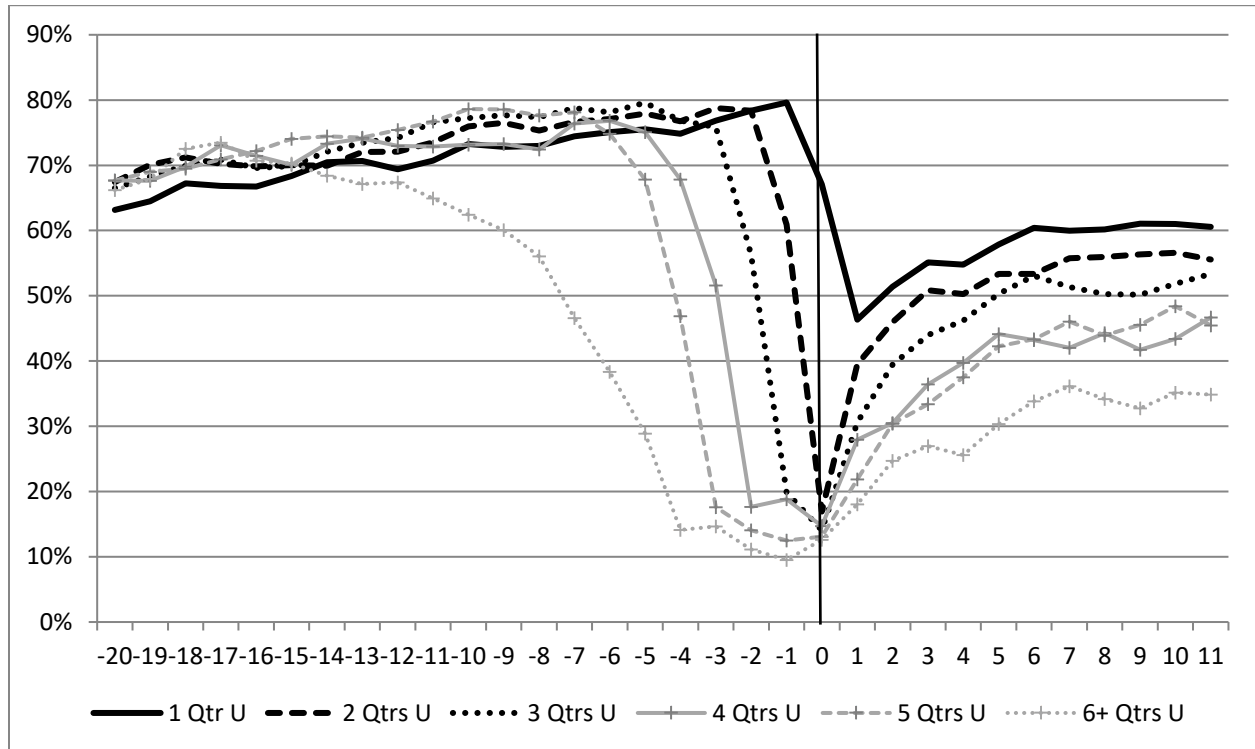

**Other EU**

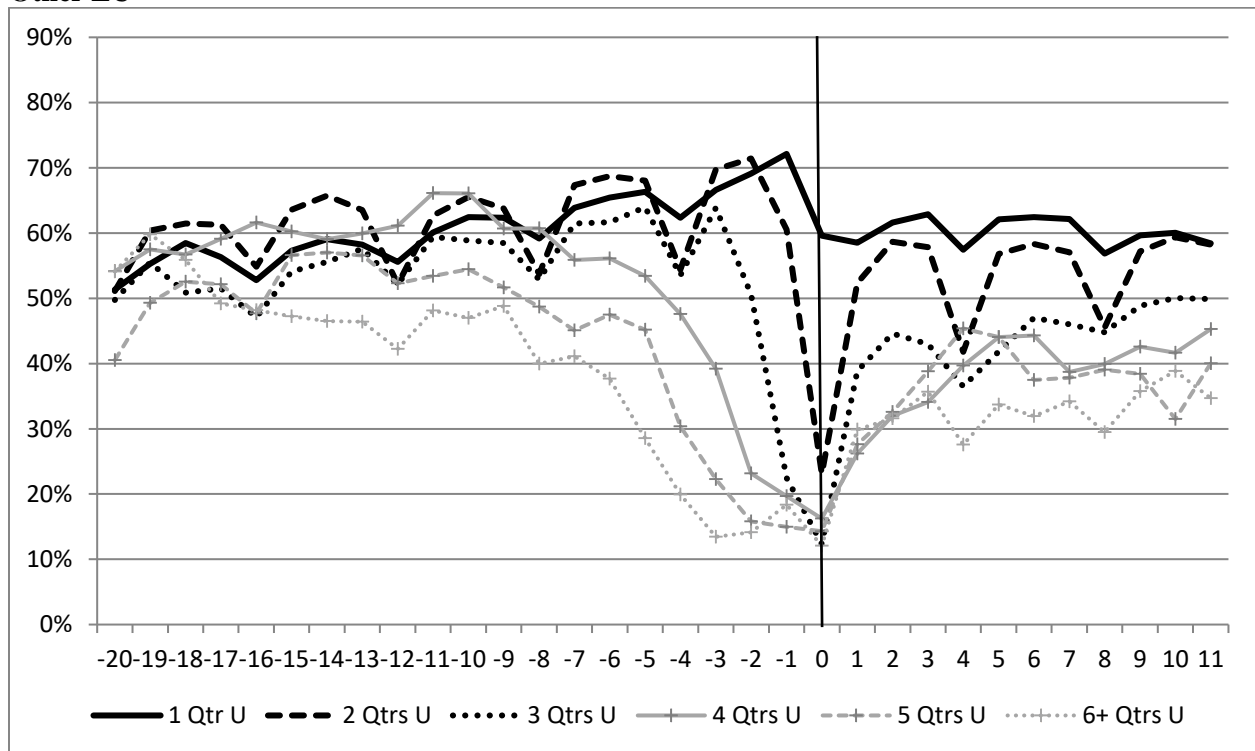

Figure A.5. Continued

Entrants NU

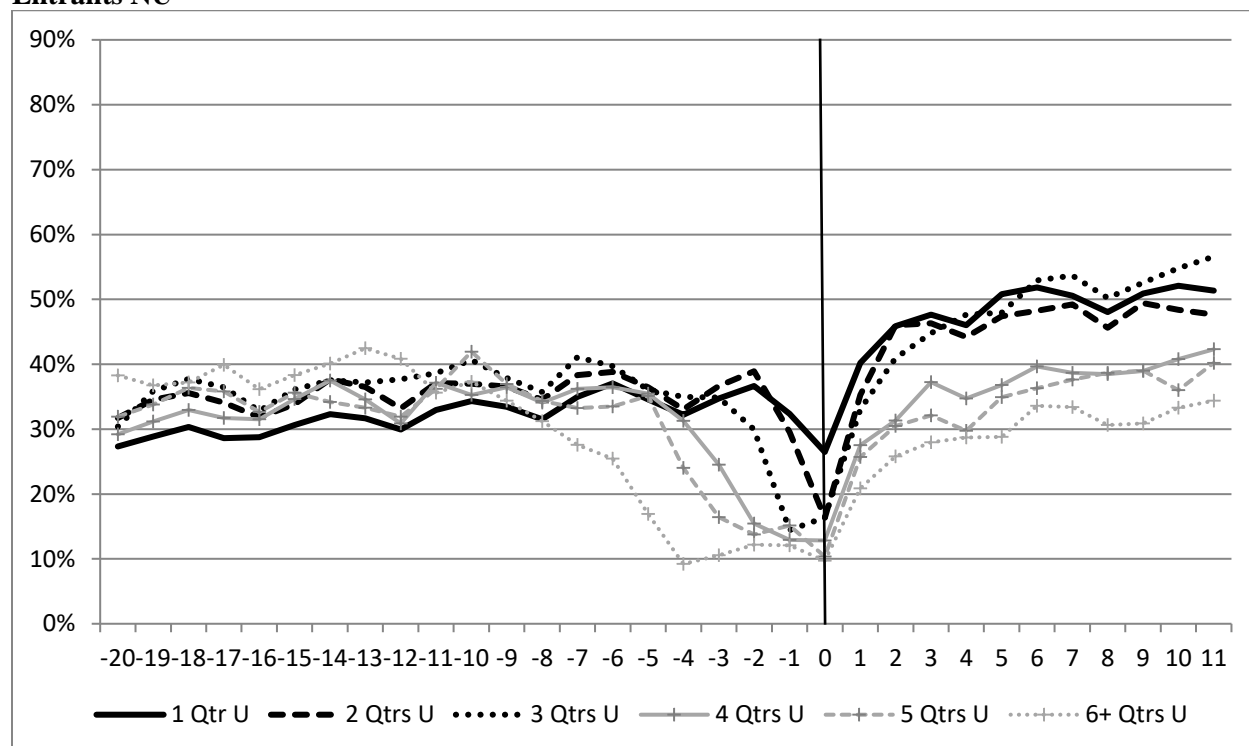

Notes: Left axis is weighted UI employment rate of March Current Population Survey (CPS) respondents in linked sample with indicated labor force status as of  $q = 0$ , the quarter of the CPS interview. NILF, not in the labor force; UI, unemployment insurance.

**Table A.1. Employment Probability Regressions with State Employment Growth Rates**

|                                                 | (1)     | (2)     | (3)     | (4)        | (5)        | (6)        |
|-------------------------------------------------|---------|---------|---------|------------|------------|------------|
| $\delta$ parameters ( $q = -8$ )                |         |         |         |            |            |            |
| $\delta_{d=0,q=-8}$                             | 0.7251  | 0.7235  | 0.7191  | 0.7224     | 0.7169     | 0.7163     |
| $\delta_{d=1,q=-8}$                             | 0.5397  | 0.5654  | 0.6321  | 0.5884     | 0.6715     | 0.6810     |
| $\delta_{d=2,q=-8}$                             | 0.5604  | 0.5795  | 0.6266  | 0.5918     | 0.6504     | 0.6599     |
| $\delta_{d=3,q=-8}$                             | 0.5754  | 0.5958  | 0.6479  | 0.6097     | 0.6745     | 0.6782     |
| $\delta_{d=4,q=-8}$                             | 0.5570  | 0.5749  | 0.6460  | 0.5796     | 0.6680     | 0.6746     |
| $\delta_{d=5,q=-8}$                             | 0.6062  | 0.6171  | 0.6732  | 0.6153     | 0.6851     | 0.6816     |
| $\delta_{d=6,q=-8}$                             | 0.4333  | 0.4557  | 0.5522  | 0.4513     | 0.5714     | 0.6105     |
| $\delta$ parameters ( $q = +8$ )                |         |         |         |            |            |            |
| $\delta_{d=0,q=+8}$                             | 0.7271  | 0.7256  | 0.7212  | 0.7267     | 0.7234     | 0.7232     |
| $\delta_{d=1,q=+8}$                             | 0.5491  | 0.5748  | 0.6415  | 0.5517     | 0.6021     | 0.6049     |
| $\delta_{d=2,q=+8}$                             | 0.4935  | 0.5126  | 0.5597  | 0.5003     | 0.5359     | 0.5387     |
| $\delta_{d=3,q=+8}$                             | 0.4903  | 0.5106  | 0.5627  | 0.4967     | 0.5361     | 0.5372     |
| $\delta_{d=4,q=+8}$                             | 0.4132  | 0.4312  | 0.5022  | 0.4265     | 0.4801     | 0.4821     |
| $\delta_{d=5,q=+8}$                             | 0.4172  | 0.4281  | 0.4842  | 0.4300     | 0.4724     | 0.4713     |
| $\delta_{d=6,q=+8}$                             | 0.3202  | 0.3426  | 0.4391  | 0.3470     | 0.4199     | 0.4314     |
| $q = +8$ Employment differences                 |         |         |         |            |            |            |
| Diff21: $\delta_{d=2,q=+8} - \delta_{d=1,q=+8}$ | -0.0555 | -0.0621 | -0.0817 | -0.0514    | -0.0662    | -0.0662    |
| Diff31: $\delta_{d=3,q=+8} - \delta_{d=1,q=+8}$ | -0.0588 | -0.0641 | -0.0787 | -0.0549    | -0.0660    | -0.0677    |
| Diff41: $\delta_{d=4,q=+8} - \delta_{d=1,q=+8}$ | -0.1359 | -0.1436 | -0.1393 | -0.1252    | -0.1219    | -0.1228    |
| Diff51: $\delta_{d=5,q=+8} - \delta_{d=1,q=+8}$ | -0.1319 | -0.1466 | -0.1572 | -0.1217    | -0.1297    | -0.1335    |
| Diff61: $\delta_{d=6,q=+8} - \delta_{d=1,q=+8}$ | -0.2289 | -0.2322 | -0.2024 | -0.2047    | -0.1822    | -0.1735    |
| Employment losses                               |         |         |         |            |            |            |
| Loss0: $\delta_{d=0,q=+8} - \delta_{d=0,q=-8}$  | 0.0020  | 0.0020  | 0.0020  | 0.0043     | 0.0064     | 0.0069     |
| Loss1: $\delta_{d=1,q=+8} - \delta_{d=1,q=-8}$  | 0.0094  | 0.0094  | 0.0094  | -0.0368    | -0.0694    | -0.0761    |
| Loss2: $\delta_{d=2,q=+8} - \delta_{d=2,q=-8}$  | -0.0668 | -0.0668 | -0.0668 | -0.0915    | -0.1145    | -0.1212    |
| Loss3: $\delta_{d=3,q=+8} - \delta_{d=3,q=-8}$  | -0.0851 | -0.0851 | -0.0851 | -0.1129    | -0.1384    | -0.1410    |
| Loss4: $\delta_{d=4,q=+8} - \delta_{d=4,q=-8}$  | -0.1438 | -0.1438 | -0.1438 | -0.1531    | -0.1879    | -0.1925    |
| Loss5: $\delta_{d=5,q=+8} - \delta_{d=5,q=-8}$  | -0.1890 | -0.1890 | -0.1890 | -0.1853    | -0.2127    | -0.2102    |
| Loss6: $\delta_{d=6,q=+8} - \delta_{d=6,q=-8}$  | -0.1132 | -0.1132 | -0.1132 | -0.1043    | -0.1515    | -0.1792    |
| Employment loss differences                     |         |         |         |            |            |            |
| LossDiff21: Loss2 – Loss1                       | -0.0762 | -0.0762 | -0.0762 | -0.0547    | -0.0451    | -0.0451    |
| LossDiff31: Loss3 – Loss1                       | -0.0945 | -0.0945 | -0.0945 | -0.0762    | -0.0690    | -0.0649    |
| LossDiff41: Loss4 – Loss1                       | -0.1532 | -0.1532 | -0.1532 | -0.1164    | -0.1185    | -0.1164    |
| LossDiff51: Loss5 – Loss1                       | -0.1984 | -0.1984 | -0.1984 | -0.1485    | -0.1434    | -0.1341    |
| LossDiff61: Loss6 – Loss1                       | -0.1226 | -0.1226 | -0.1226 | -0.0675    | -0.0821    | -0.1030    |
| $R$ -squared                                    | 0.0131  | 0.0377  | 0.3600  | 0.0475     | 0.3891     | 0.4389     |
| CPS demographics controls                       |         | Yes     | Yes     | Yes        | Yes        | Yes        |
| Year dummy controls                             |         | Yes     | Yes     | Yes        | Yes        | Yes        |
| Work history controls                           |         |         | Yes     |            | Yes        | Yes        |
| Work trajectory controls                        |         |         |         |            |            | Yes        |
| State %Emp Change                               | Yes     | Yes     | Yes     | Yes        | Yes        | Yes        |
| Coefficient vector $\beta$ or $\beta(q)$        | $\beta$ | $\beta$ | $\beta$ | $\beta(q)$ | $\beta(q)$ | $\beta(q)$ |

Notes: Sample is 285,741 persons who are employed or unemployed in CPS at  $q = 0$  and for whom a PIK is available for linking to the LEHD. Number of observations in regression is 571,482. All control variables are deviations from means. Dependent variable is {0,1} employment indicator; mean = 0.7130. All estimated  $\delta$  parameters are statistically different from zero. Gray shading in the lower three panels



indicates reported estimate is statistically significant at the 0.01 level. CPS, Current Population Survey; LEHD, Longitudinal Employer-Household Dynamics; PIK, Protected Identification Key.

**Table A.2. Employment Probability Regressions with State by Industry Employment Growth Rates**

|                                                 | (1)     | (2)     | (3)     | (4)        | (5)        | (6)        |
|-------------------------------------------------|---------|---------|---------|------------|------------|------------|
| $\delta$ parameters ( $q = -8$ )                |         |         |         |            |            |            |
| $\delta_{d=0,q=-8}$                             | 0.7253  | 0.7237  | 0.7192  | 0.7226     | 0.7170     | 0.7163     |
| $\delta_{d=1,q=-8}$                             | 0.5380  | 0.5641  | 0.6319  | 0.5863     | 0.6706     | 0.6802     |
| $\delta_{d=2,q=-8}$                             | 0.5576  | 0.5780  | 0.6262  | 0.5895     | 0.6494     | 0.6590     |
| $\delta_{d=3,q=-8}$                             | 0.5718  | 0.5938  | 0.6474  | 0.6065     | 0.6732     | 0.6770     |
| $\delta_{d=4,q=-8}$                             | 0.5526  | 0.5723  | 0.6455  | 0.5752     | 0.6662     | 0.6731     |
| $\delta_{d=5,q=-8}$                             | 0.6010  | 0.6143  | 0.6727  | 0.6108     | 0.6833     | 0.6800     |
| $\delta_{d=6,q=-8}$                             | 0.4301  | 0.4541  | 0.5518  | 0.4487     | 0.5702     | 0.6094     |
| $\delta$ parameters ( $q = +8$ )                |         |         |         |            |            |            |
| $\delta_{d=0,q=+8}$                             | 0.7273  | 0.7257  | 0.7212  | 0.7267     | 0.7233     | 0.7231     |
| $\delta_{d=1,q=+8}$                             | 0.5473  | 0.5735  | 0.6413  | 0.5513     | 0.6026     | 0.6054     |
| $\delta_{d=2,q=+8}$                             | 0.4908  | 0.5112  | 0.5594  | 0.4997     | 0.5362     | 0.5390     |
| $\delta_{d=3,q=+8}$                             | 0.4867  | 0.5086  | 0.5622  | 0.4959     | 0.5365     | 0.5376     |
| $\delta_{d=4,q=+8}$                             | 0.4088  | 0.4285  | 0.5017  | 0.4255     | 0.4809     | 0.4829     |
| $\delta_{d=5,q=+8}$                             | 0.4120  | 0.4253  | 0.4837  | 0.4289     | 0.4730     | 0.4721     |
| $\delta_{d=6,q=+8}$                             | 0.3170  | 0.3409  | 0.4386  | 0.3463     | 0.4202     | 0.4318     |
| $q = +8$ Employment differences                 |         |         |         |            |            |            |
| Diff21: $\delta_{d=2,q=+8} - \delta_{d=1,q=+8}$ | -0.0566 | -0.0623 | -0.0819 | -0.0516    | -0.0664    | -0.0664    |
| Diff31: $\delta_{d=3,q=+8} - \delta_{d=1,q=+8}$ | -0.0606 | -0.0649 | -0.0790 | -0.0554    | -0.0661    | -0.0678    |
| Diff41: $\delta_{d=4,q=+8} - \delta_{d=1,q=+8}$ | -0.1386 | -0.1450 | -0.1396 | -0.1258    | -0.1216    | -0.1225    |
| Diff51: $\delta_{d=5,q=+8} - \delta_{d=1,q=+8}$ | -0.1354 | -0.1482 | -0.1576 | -0.1224    | -0.1295    | -0.1333    |
| Diff61: $\delta_{d=6,q=+8} - \delta_{d=1,q=+8}$ | -0.2304 | -0.2326 | -0.2026 | -0.2050    | -0.1824    | -0.1736    |
| Employment Losses                               |         |         |         |            |            |            |
| Loss0: $\delta_{d=0,q=+8} - \delta_{d=0,q=-8}$  | 0.0020  | 0.0020  | 0.0020  | 0.0041     | 0.0063     | 0.0068     |
| Loss1: $\delta_{d=1,q=+8} - \delta_{d=1,q=-8}$  | 0.0094  | 0.0094  | 0.0094  | -0.0351    | -0.0680    | -0.0748    |
| Loss2: $\delta_{d=2,q=+8} - \delta_{d=2,q=-8}$  | -0.0668 | -0.0668 | -0.0668 | -0.0898    | -0.1132    | -0.1200    |
| Loss3: $\delta_{d=3,q=+8} - \delta_{d=3,q=-8}$  | -0.0851 | -0.0851 | -0.0851 | -0.1107    | -0.1367    | -0.1394    |
| Loss4: $\delta_{d=4,q=+8} - \delta_{d=4,q=-8}$  | -0.1438 | -0.1438 | -0.1438 | -0.1497    | -0.1853    | -0.1901    |
| Loss5: $\delta_{d=5,q=+8} - \delta_{d=5,q=-8}$  | -0.1890 | -0.1890 | -0.1890 | -0.1819    | -0.2103    | -0.2079    |
| Loss6: $\delta_{d=6,q=+8} - \delta_{d=6,q=-8}$  | -0.1132 | -0.1132 | -0.1132 | -0.1025    | -0.1500    | -0.1777    |
| Employment Loss Differences                     |         |         |         |            |            |            |
| LossDiff21: Loss2 – Loss1                       | -0.0762 | -0.0762 | -0.0762 | -0.0547    | -0.0452    | -0.0452    |
| LossDiff31: Loss3 – Loss1                       | -0.0945 | -0.0945 | -0.0945 | -0.0756    | -0.0687    | -0.0646    |
| LossDiff41: Loss4 – Loss1                       | -0.1532 | -0.1532 | -0.1532 | -0.1147    | -0.1173    | -0.1153    |
| LossDiff51: Loss5 – Loss1                       | -0.1984 | -0.1984 | -0.1984 | -0.1469    | -0.1423    | -0.1331    |
| LossDiff61: Loss6 – Loss1                       | -0.1225 | -0.1225 | -0.1225 | -0.0674    | -0.0820    | -0.1028    |
| $R$ -squared                                    | 0.0143  | 0.0390  | 0.3600  | 0.0495     | 0.3894     | 0.4392     |
| CPS demographics controls                       |         | Yes     | Yes     | Yes        | Yes        | Yes        |
| Year dummy controls                             |         | Yes     | Yes     | Yes        | Yes        | Yes        |
| Work history controls                           |         |         | Yes     |            | Yes        | Yes        |
| Work trajectory controls                        |         |         |         |            |            | Yes        |
| State-Industry %Emp Change                      | Yes     | Yes     | Yes     | Yes        | Yes        | Yes        |
| Coefficient vector $\beta$ or $\beta(q)$        | $\beta$ | $\beta$ | $\beta$ | $\beta(q)$ | $\beta(q)$ | $\beta(q)$ |

Notes: Sample is 285,741 persons who are employed or unemployed in CPS at  $q = 0$  and for whom a PIK is available for linking to the LEHD. Number of observations in regression is 571,482. All control variables are deviations from means. Dependent variable is {0,1} employment indicator; mean = 0.7130. All estimated  $\delta$  parameters are statistically different from zero. Gray shading in the lower three panels

indicates reported estimate is statistically significant at the 0.01 level. CPS, Current Population Survey; LEHD, Longitudinal Employer-Household Dynamics; PIK, Protected Identification Key.

**Table A.3. Employment Probability Regressions with State by Industry Employment Growth Rates, Interacted with Whether Employed or Unemployed at  $q = 0$**

|                                                 | (1)     | (2)     | (3)     | (4)        | (5)        | (6)        |
|-------------------------------------------------|---------|---------|---------|------------|------------|------------|
| $\delta$ parameters ( $q = -8$ )                |         |         |         |            |            |            |
| $\delta_{d=0,q=-8}$                             | 0.7257  | 0.7241  | 0.7193  | 0.7234     | 0.7175     | 0.7167     |
| $\delta_{d=1,q=-8}$                             | 0.5327  | 0.5589  | 0.6304  | 0.5768     | 0.6656     | 0.6762     |
| $\delta_{d=2,q=-8}$                             | 0.5507  | 0.5713  | 0.6242  | 0.5772     | 0.6429     | 0.6538     |
| $\delta_{d=3,q=-8}$                             | 0.5636  | 0.5858  | 0.6451  | 0.5918     | 0.6655     | 0.6707     |
| $\delta_{d=4,q=-8}$                             | 0.5429  | 0.5629  | 0.6428  | 0.5580     | 0.6572     | 0.6658     |
| $\delta_{d=5,q=-8}$                             | 0.5901  | 0.6038  | 0.6696  | 0.5915     | 0.6732     | 0.6718     |
| $\delta_{d=6,q=-8}$                             | 0.4226  | 0.4468  | 0.5496  | 0.4353     | 0.5631     | 0.6037     |
| $\delta$ parameters ( $q = +8$ )                |         |         |         |            |            |            |
| $\delta_{d=0,q=+8}$                             | 0.7278  | 0.7261  | 0.7213  | 0.7268     | 0.7232     | 0.7229     |
| $\delta_{d=1,q=+8}$                             | 0.5421  | 0.5683  | 0.6398  | 0.5504     | 0.6045     | 0.6077     |
| $\delta_{d=2,q=+8}$                             | 0.4839  | 0.5045  | 0.5574  | 0.4986     | 0.5387     | 0.5419     |
| $\delta_{d=3,q=+8}$                             | 0.4785  | 0.5007  | 0.5599  | 0.4946     | 0.5395     | 0.5411     |
| $\delta_{d=4,q=+8}$                             | 0.3991  | 0.4191  | 0.4990  | 0.4240     | 0.4845     | 0.4870     |
| $\delta_{d=5,q=+8}$                             | 0.4011  | 0.4148  | 0.4806  | 0.4272     | 0.4770     | 0.4766     |
| $\delta_{d=6,q=+8}$                             | 0.3094  | 0.3336  | 0.4365  | 0.3451     | 0.4230     | 0.4350     |
| $q = +8$ Employment Differences                 |         |         |         |            |            |            |
| Diff21: $\delta_{d=2,q=+8} - \delta_{d=1,q=+8}$ | -0.0582 | -0.0639 | -0.0823 | -0.0518    | -0.0658    | -0.0658    |
| Diff31: $\delta_{d=3,q=+8} - \delta_{d=1,q=+8}$ | -0.0636 | -0.0677 | -0.0798 | -0.0558    | -0.0650    | -0.0666    |
| Diff41: $\delta_{d=4,q=+8} - \delta_{d=1,q=+8}$ | -0.1430 | -0.1492 | -0.1408 | -0.1264    | -0.1200    | -0.1207    |
| Diff51: $\delta_{d=5,q=+8} - \delta_{d=1,q=+8}$ | -0.1410 | -0.1535 | -0.1591 | -0.1232    | -0.1275    | -0.1310    |
| Diff61: $\delta_{d=6,q=+8} - \delta_{d=1,q=+8}$ | -0.2327 | -0.2347 | -0.2033 | -0.2054    | -0.1815    | -0.1727    |
| Employment Losses                               |         |         |         |            |            |            |
| Loss0: $\delta_{d=0,q=+8} - \delta_{d=0,q=-8}$  | 0.0020  | 0.0020  | 0.0020  | 0.0034     | 0.0057     | 0.0063     |
| Loss1: $\delta_{d=1,q=+8} - \delta_{d=1,q=-8}$  | 0.0094  | 0.0094  | 0.0094  | -0.0264    | -0.0610    | -0.0685    |
| Loss2: $\delta_{d=2,q=+8} - \delta_{d=2,q=-8}$  | -0.0668 | -0.0668 | -0.0668 | -0.0785    | -0.1042    | -0.1119    |
| Loss3: $\delta_{d=3,q=+8} - \delta_{d=3,q=-8}$  | -0.0851 | -0.0851 | -0.0851 | -0.0972    | -0.1260    | -0.1297    |
| Loss4: $\delta_{d=4,q=+8} - \delta_{d=4,q=-8}$  | -0.1438 | -0.1438 | -0.1438 | -0.1340    | -0.1727    | -0.1787    |
| Loss5: $\delta_{d=5,q=+8} - \delta_{d=5,q=-8}$  | -0.1890 | -0.1890 | -0.1890 | -0.1643    | -0.1962    | -0.1952    |
| Loss6: $\delta_{d=6,q=+8} - \delta_{d=6,q=-8}$  | -0.1132 | -0.1132 | -0.1132 | -0.0902    | -0.1401    | -0.1687    |
| Employment Loss Differences                     |         |         |         |            |            |            |
| LossDiff21: Loss2 – Loss1                       | -0.0762 | -0.0762 | -0.0762 | -0.0522    | -0.0432    | -0.0434    |
| LossDiff31: Loss3 – Loss1                       | -0.0945 | -0.0945 | -0.0945 | -0.0708    | -0.0650    | -0.0612    |
| LossDiff41: Loss4 – Loss1                       | -0.1532 | -0.1532 | -0.1532 | -0.1076    | -0.1117    | -0.1102    |
| LossDiff51: Loss5 – Loss1                       | -0.1984 | -0.1984 | -0.1984 | -0.1379    | -0.1351    | -0.1267    |
| LossDiff61: Loss6 – Loss1                       | -0.1226 | -0.1225 | -0.1225 | -0.0638    | -0.0791    | -0.1002    |
| $R$ -squared                                    | 0.0147  | 0.0392  | 0.3600  | 0.0500     | 0.3896     | 0.4393     |
| CPS demographics controls                       |         | Yes     | Yes     | Yes        | Yes        | Yes        |
| Year dummy controls                             |         | Yes     | Yes     | Yes        | Yes        | Yes        |
| Work history controls                           |         |         | Yes     |            | Yes        | Yes        |
| Work trajectory controls                        |         |         |         |            |            | Yes        |
| State-Ind %Emp Change * E                       | Yes     | Yes     | Yes     | Yes        | Yes        | Yes        |
| State-Ind %Emp Change * U                       | Yes     | Yes     | Yes     | Yes        | Yes        | Yes        |
| Coefficient vector $\beta$ or $\beta(q)$        | $\beta$ | $\beta$ | $\beta$ | $\beta(q)$ | $\beta(q)$ | $\beta(q)$ |

Notes: Sample is 285,741 persons who are employed or unemployed in CPS at  $q = 0$  and for whom a PIK is available for linking to the LEHD. Number of observations in regression is 571,482. All control variables are deviations from means. Dependent variable is {0,1} employment indicator; mean = 0.7130.

All estimated  $\delta$  parameters are statistically different from zero. Gray shading in the lower three panels indicates reported estimate is statistically significant at the 0.01 level. CPS, Current Population Survey; LEHD, Longitudinal Employer-Household Dynamics; PIK, Protected Identification Key.
